# Supplementary material
Source: Springer Nature journal article supplement (https://www.springermedizin.de/resource/supplementary/12911_2013_794_MOESM2_ESM.pdf/9526654)
Supplement: MOESM2 [file 9526654]

# *Linkage Processing*

File  
Verification

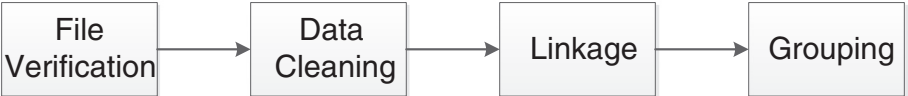

```
graph LR; A[File Verification] --> B[Data Cleaning]; B --> C[Linkage]; C --> D[Grouping]
```

Data  
Cleaning

Linkage

Grouping
